# Supplementary material
Source: Springer Nature journal article supplement (https://www.springermedizin.de/resource/supplementary/12913_2013_3099_MOESM4_ESM.docx/9532412)
Supplement: MOESM4 [file 9532412]

Table 2: Young people's views and experiences of available Sexual and Reproductive Health services

| Facility type | Gender | Positive views and experiences of SRH services | Negative views and experiences of SRH services |
| --- | --- | --- | --- |
| Integrated facility | Girls | - Good and friendly services - Positive health service providers’ (HSP) attitude - Low cost of services | - HSP attitude sometimes judgmental - Provider gender – not always female - Long waiting time – long queues - Lack of essential drugs - Corruption in health facilities |
| Boys | - Organisation of services – services perfect for women and children - HSP attitude is positive - Cost of services – affordable, waiver system available - Facility is clean - Qualified HSP - Facility location- walking distance | - HSP attitude poor - Lack of awareness of available services - Youth-related resources not available such as library, games - Provider’s gender not always male - Long waiting time - Corruption in public health facilities: - Lack of proper directions to facility and service areas - Lack of privacy - Boys feel uncomfortable sitting between women |
| Youth centre (YC) | Girls | - Good services - youth-only - Health service providers are younger - Non-health benefits of participation in YC activities – personal gains, self development, career progression - Youth centre attractiveness promotes step-wise use of services | - Lack of full-time clinical staff - SRH services not provided around the clock - Occasional lack of supplies such as drugs - Lack of awareness of services offered |
| Boys | - Wide range of services available: voluntary counselling and testing (VCT), treatment of STIs, contraception, counselling, games, educational films watching movies - Health provider attitude – positive - Youth centre attractiveness - Non-health benefits of the YC | - Limited hours of operation for public facilities - Inaccessibility – with regard to public transportation - Lack of essential supplies - Lack of awareness of available services - Poor system of getting updated SRH information |
